# Supplementary material
Source: HighWire-hosted journal article supplement (https://erj.ersjournals.com/content/50/3/1700010)
Supplement: inline-supplementary-material-1 [file inline-supplementary-material-1.pdf]

## Worked Example for SI units

Male 30 years old, 178cm, TLCO = 7.7 SI units

Mspline = 0.101788 Sspline = -0.11049

$M = \exp(-8.758548 + 2.151173 \cdot \ln(\text{height}) - 0.027927 \cdot \ln(\text{age}) + \text{Mspline})$

$M = \exp(-8.758548 + 2.151173 \cdot \ln(178) - 0.027927 \cdot \ln(30) + 0.101788)$

$M = 10.970$

$S = \exp(-1.98249 + 0.03430 \cdot \ln(\text{age}) + \text{Sspline})$

$S = \exp(-1.98249 + 0.03430 \cdot \ln(30) - 0.11049)$

$S = 0.139$

$L = 0.38713$

$\% \text{ predicted} = (\text{measured}/M) \cdot 100$

$\% \text{ predicted} = (7.7/10.970) \cdot 100$

$\% \text{ predicted} = 70.191$

Lower limit of Normal (LLN) (5th percentile) =  $\exp(\ln(M) + \ln(1 - 1.645 \cdot L \cdot S)/L)$

Lower limit of Normal (LLN) (5th percentile) =  $\exp(\ln(10.970) + \ln(1 - 1.645 \cdot 0.38713 \cdot 0.139)/0.38713)$

Lower limit of Normal (LLN) (5th percentile) = 8.634

Z-score =  $((\text{measured}/M)^L - 1)/(L \cdot S)$

Z-score =  $((7.7/10.970)^{0.38713} - 1)/(0.38713 \cdot 0.139)$

Z-score = -2.3796

## Methodological Differences

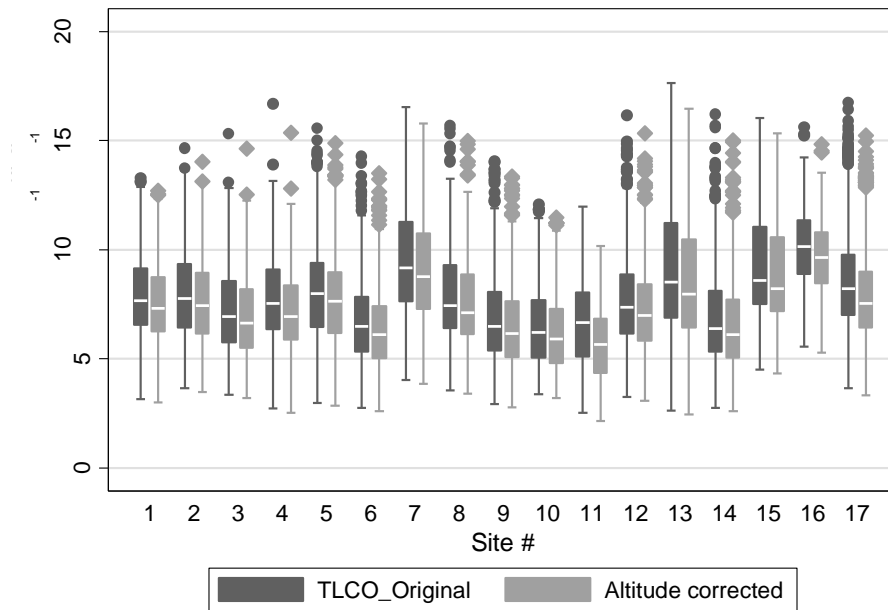

Figure S1. Absolute difference in  $TLCO$  values prior to, and after correction for partial pressure of oxygen, using centre altitude as a proxy.

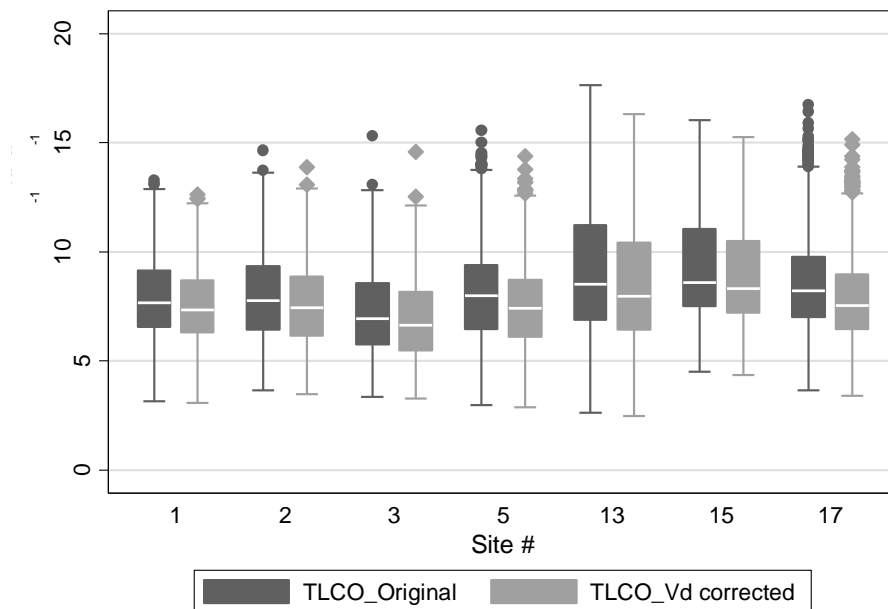

Figure S2. Absolute difference in  $TLCO$  values prior to, and after correction for anatomic dead space ( $V_d$ )

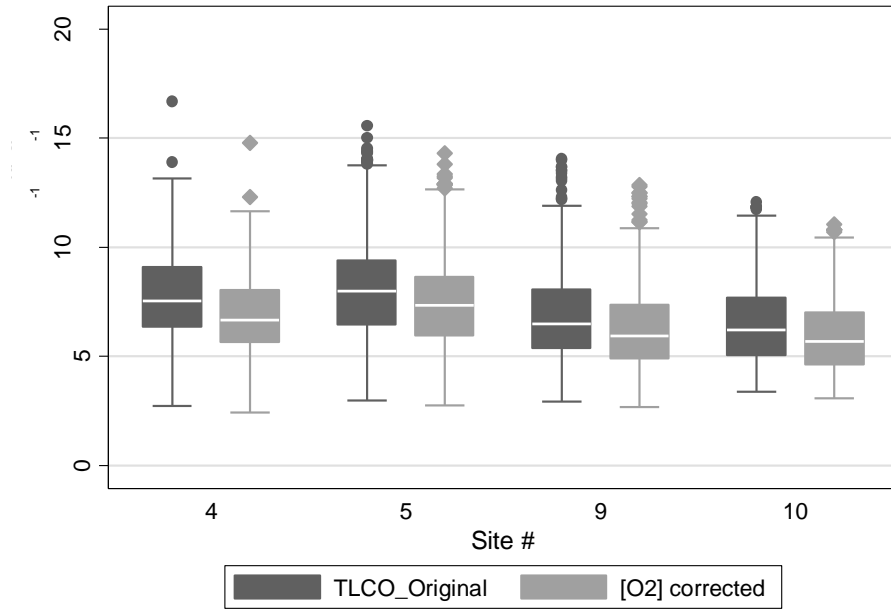

Figure S3. Absolute difference in *TLCO* values prior to, and after corrected for gas concentration.

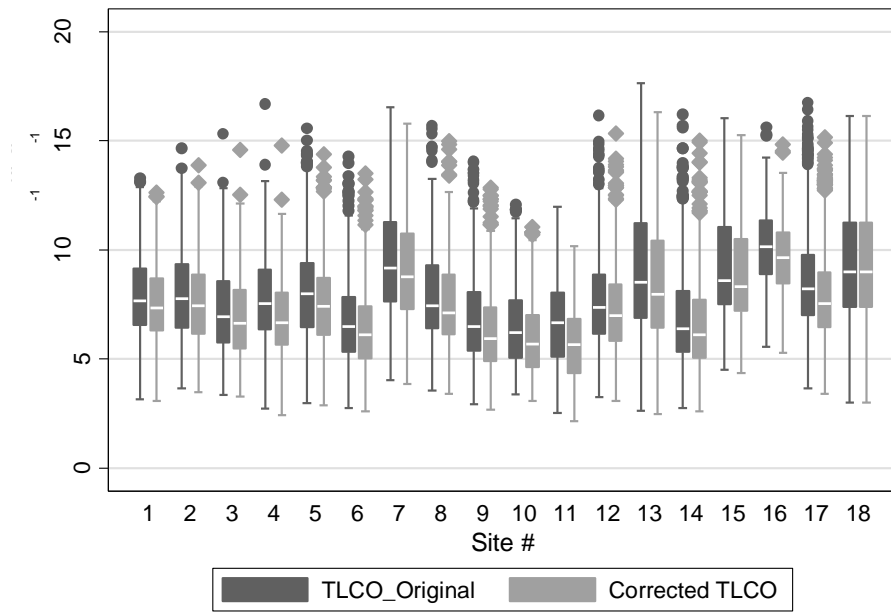

Figure S4. Absolute differences in *TLCO* values prior to, and after correction for anatomic dead space, gas concentration, and partial pressure of oxygen.

Study Population

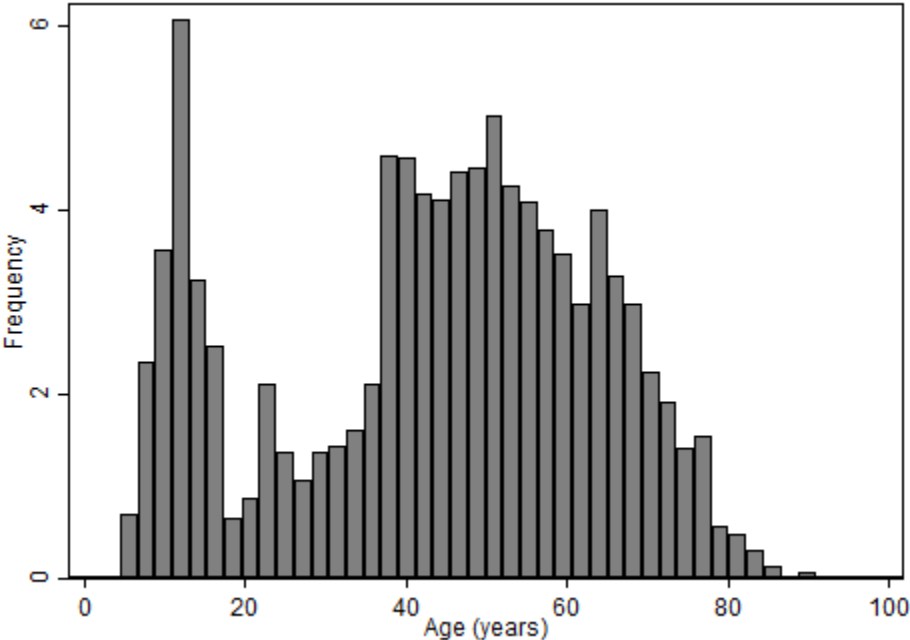

Figure S5: Age distribution of study population (median 45 years; inter-quarter range 26 to 57)

## Details regarding the correction for anatomical dead space

The dead space,  $V_D$ , is composed of the equipment dead space ( $V_{D, \text{equip}}$ ) plus the anatomic dead space ( $V_{D, \text{an}}$ ):

$$V_D = V_{D, \text{equip}} + V_{D, \text{an}}$$

The equipment dead space, which includes the filter, is fixed and is reported by the equipment manufacturer.

The alveolar volume,  $V_A$ , is calculated from the inspired volume of test gas,  $V_I$ , minus the dead space times the inspired tracer gas fractional concentration ( $F_{I\text{Tr}}$ ) divided by the tracer gas fractional concentration in the exhaled gas ( $F_{E\text{Tr}}$ ):

$$V_A = (V_I - V_D) * F_{I\text{Tr}} / F_{E\text{Tr}} \quad (1)$$

To calculate  $TLCO$ ,  $V_A$  is converted to STPD and multiplied by the logarithmic decay in CO divided by time and divided by barometric pressure. However,  $TLCO$  is directly proportional to  $V_A$  so that any percent change in  $V_A$  translates to an equal percent change in  $TLCO$ .

Some systems use a fixed anatomic dead space ( $V_{D, \text{an, fixed}}$ ) of 150 mL since this is an option specified in the 2005 ATS/ERS standards.(1)

The anatomic dead space in mL can be estimated ( $V_{D, \text{an, est}}$ ) in subjects with  $BMI \leq 30 \text{ kg/m}^2$  as  $2.2 \text{ mL/kg}$ (2) and in subjects with  $BMI > 30 \text{ kg/m}^2$  as  $\text{height}^2/189.4$ .(1)

In order to adjust  $TLCO$ , it must be recalculated using an estimated anatomic dead space in place of a fixed anatomic dead space.

If  $V_I$  and  $V_{D, \text{equip}}$  are known, then  $TLCO$  can be recalculated relatively simply by dividing by  $(V_I - V_{D, \text{equip}} - V_{D, \text{an, fixed}})$  and multiplying by  $(V_I - V_{D, \text{equip}} - V_{D, \text{an, est}})$ :

$$TLCO' = TLCO * (V_I - V_{D, \text{equip}} - V_{D, \text{an, est}}) / (V_I - V_{D, \text{equip}} - V_{D, \text{an, fixed}}) \quad (2)$$

Where  $V_I$  was not available, we assumed  $V_I = FVC$ . Although  $V_I$  usually tends to be larger than FVC because of dynamic gas trapping, the amount of error in the adjusted  $TLCO$  introduced by using FVC instead of  $V_I$  will usually be less than 0.1%.

The change in  $TLCO$  calculated using a fixed anatomic dead space and adjusted to an estimated anatomic dead space is typically 6% for a 20 kg child and -2% for a 100 kg adult.

## References

1. Macintyre N, Crapo RO, Viegi G, Johnson DC, van der Grinten CP, Brusasco V, et al. Standardisation of the single-breath determination of carbon monoxide uptake in the lung. *Eur Respir J.* 2005;26(4):720-35.
2. Cotes JE. *Lung Function*. 5th ed. London: Blackwell Scientific Publication; 1993.
